# Supplementary material for: Sea urchin harvest inside marine protected areas: an opportunity to investigate the effects of exploitation where trophic upgrading is achieved
Source: PeerJ. 2022 Mar 7;10:e12971. doi: 10.7717/peerj.12971 (PMC8908888; doi:10.7717/peerj.12971)
Supplement: Supplemental Information 6 — The total and commercial sea urchin abundance and the old and 2019 total abundance of sea urchins. [file peerj-10-12971-s006.xlsx]

## Sheet: 2019 density
MPA	site	HARVEST	total density/m2	commercial density/m2
CI	la speranza	UH	5	3
CI	la speranza	UH	5	2
CI	la speranza	UH	4	1
CI	la speranza	UH	4	1
CI	la speranza	UH	5	0
CI	la speranza	UH	5	3
CI	la speranza	UH	6	3
CI	la speranza	UH	5	1
CI	la speranza	UH	3	2
CI	la speranza	UH	2	0
CI	la speranza	UH	6	2
CI	la speranza	UH	4	1
CI	la speranza	UH	5	1
CI	la speranza	UH	7	4
CI	la speranza	UH	6	1
CI	la speranza	UH	2	0
CI	la speranza	UH	4	1
CI	la speranza	UH	8	1
CI	la speranza	UH	3	0
CI	la speranza	UH	5	0
CI	la speranza	UH	3	2
CI	la speranza	UH	1	1
CI	la speranza	UH	5	0
CI	la speranza	UH	3	0
CI	la speranza	UH	3	1
CI	la speranza	UH	1	0
CI	la speranza	UH	4	2
CI	la speranza	UH	2	1
CI	la speranza	UH	2	0
CI	bombarde	UH	0	0
CI	bombarde	UH	2	0
CI	bombarde	UH	2	0
CI	bombarde	UH	0	0
CI	bombarde	UH	0	0
CI	bombarde	UH	0	0
CI	bombarde	UH	3	2
CI	bombarde	UH	2	1
CI	bombarde	UH	0	0
CI	bombarde	UH	0	0
CI	bombarde	UH	0	0
CI	bombarde	UH	2	0
CI	bombarde	UH	0	0
CI	bombarde	UH	0	0
CI	bombarde	UH	1	1
CI	bombarde	UH	4	1
CI	bombarde	UH	5	0
CI	bombarde	UH	9	0
CI	bombarde	UH	2	0
CI	bombarde	UH	4	1
CI	bombarde	UH	6	0
CI	bombarde	UH	6	0
CI	bombarde	UH	8	3
CI	bombarde	UH	9	1
CI	bombarde	UH	12	2
CI	bombarde	UH	2	1
CI	bombarde	UH	7	3
CI	bombarde	UH	2	1
CI	bombarde	UH	5	1
CI	bombarde	UH	6	4
CI	calabona	UH	0	0
CI	calabona	UH	1	1
CI	calabona	UH	0	0
CI	calabona	UH	0	0
CI	calabona	UH	1	0
CI	calabona	UH	1	0
CI	calabona	UH	0	0
CI	calabona	UH	2	2
CI	calabona	UH	0	0
CI	calabona	UH	0	0
CI	calabona	UH	5	2
CI	calabona	UH	2	1
CI	calabona	UH	0	0
CI	calabona	UH	0	0
CI	calabona	UH	0	0
CI	calabona	UH	4	0
CI	calabona	UH	0	0
CI	calabona	UH	1	0
CI	calabona	UH	0	0
CI	calabona	UH	0	0
CI	calabona	UH	1	0
CI	calabona	UH	0	0
CI	calabona	UH	2	1
CI	calabona	UH	2	0
CI	calabona	UH	2	1
CI	calabona	UH	4	1
CI	calabona	UH	0	0
CI	calabona	UH	0	0
CI	calabona	UH	1	0
CI	calabona	UH	0	0
CI	puntanegra	UH	2	0
CI	puntanegra	UH	2	1
CI	puntanegra	UH	0	0
CI	puntanegra	UH	0	0
CI	puntanegra	UH	0	0
CI	puntanegra	UH	1	1
CI	puntanegra	UH	0	0
CI	puntanegra	UH	0	0
CI	puntanegra	UH	0	0
CI	puntanegra	UH	0	0
CI	puntanegra	UH	0	0
CI	puntanegra	UH	0	0
CI	puntanegra	UH	0	0
CI	puntanegra	UH	0	0
CI	puntanegra	UH	0	0
CI	puntanegra	UH	4	1
CI	puntanegra	UH	3	1
CI	puntanegra	UH	3	0
CI	puntanegra	UH	2	1
CI	puntanegra	UH	3	1
CI	puntanegra	UH	2	1
CI	puntanegra	UH	4	1
CI	puntanegra	UH	6	2
CI	puntanegra	UH	6	2
CI	puntanegra	UH	4	1
CI	puntanegra	UH	3	0
CI	puntanegra	UH	6	5
CI	puntanegra	UH	5	3
CI	puntanegra	UH	5	3
CI	puntanegra	UH	3	0
CI	ghiscera	UH	0	0
CI	ghiscera	UH	0	0
CI	ghiscera	UH	22	0
CI	ghiscera	UH	15	0
CI	ghiscera	UH	0	0
CI	ghiscera	UH	0	0
CI	ghiscera	UH	0	0
CI	ghiscera	UH	0	0
CI	ghiscera	UH	0	0
CI	ghiscera	UH	0	0
CI	ghiscera	UH	0	0
CI	ghiscera	UH	7	0
CI	ghiscera	UH	0	0
CI	ghiscera	UH	0	0
CI	ghiscera	UH	0	0
CI	ghiscera	UH	1	0
CI	ghiscera	UH	3	0
CI	ghiscera	UH	0	0
CI	ghiscera	UH	0	0
CI	ghiscera	UH	0	0
CI	ghiscera	UH	1	0
CI	ghiscera	UH	1	0
CI	ghiscera	UH	0	0
CI	ghiscera	UH	0	0
CI	ghiscera	UH	0	0
CI	ghiscera	UH	3	1
CI	ghiscera	UH	0	0
CI	ghiscera	UH	0	0
CI	ghiscera	UH	0	0
CI	ghiscera	UH	0	0
CI	torre porticciolo	UH	4	0
CI	torre porticciolo	UH	0	0
CI	torre porticciolo	UH	3	0
CI	torre porticciolo	UH	0	0
CI	torre porticciolo	UH	10	0
CI	torre porticciolo	UH	2	0
CI	torre porticciolo	UH	1	0
CI	torre porticciolo	UH	0	0
CI	torre porticciolo	UH	1	1
CI	torre porticciolo	UH	0	0
CI	torre porticciolo	UH	0	0
CI	torre porticciolo	UH	0	0
CI	torre porticciolo	UH	0	0
CI	torre porticciolo	UH	0	0
CI	torre porticciolo	UH	0	0
CI	torre porticciolo	UH	7	0
CI	torre porticciolo	UH	16	0
CI	torre porticciolo	UH	15	0
CI	torre porticciolo	UH	9	1
CI	torre porticciolo	UH	15	0
CI	torre porticciolo	UH	16	0
CI	torre porticciolo	UH	13	1
CI	torre porticciolo	UH	13	1
CI	torre porticciolo	UH	13	0
CI	torre porticciolo	UH	10	0
CI	torre porticciolo	UH	12	2
CI	torre porticciolo	UH	6	0
CI	torre porticciolo	UH	2	0
CI	torre porticciolo	UH	15	1
CI	torre porticciolo	UH	5	0
CI	poltagra	RH	2	2
CI	poltagra	RH	1	1
CI	poltagra	RH	1	0
CI	poltagra	RH	0	1
CI	poltagra	RH	1	1
CI	poltagra	RH	0	0
CI	poltagra	RH	0	0
CI	poltagra	RH	0	0
CI	poltagra	RH	0	0
CI	poltagra	RH	0	0
CI	poltagra	RH	2	0
CI	poltagra	RH	0	0
CI	poltagra	RH	4	3
CI	poltagra	RH	0	0
CI	poltagra	RH	1	1
CI	poltagra	RH	3	3
CI	poltagra	RH	0	0
CI	poltagra	RH	3	3
CI	poltagra	RH	3	3
CI	poltagra	RH	0	0
CI	punta giglio	RH	1	0
CI	punta giglio	RH	4	0
CI	punta giglio	RH	2	0
CI	punta giglio	RH	0	0
CI	punta giglio	RH	0	0
CI	punta giglio	RH	0	0
CI	punta giglio	RH	1	0
CI	punta giglio	RH	0	0
CI	punta giglio	RH	1	1
CI	punta giglio	RH	0	0
CI	punta giglio	RH	0	0
CI	punta giglio	RH	1	0
CI	punta giglio	RH	1	0
CI	punta giglio	RH	2	1
CI	punta giglio	RH	0	0
CI	punta giglio	RH	3	0
CI	punta giglio	RH	0	0
CI	punta giglio	RH	0	0
CI	punta giglio	RH	0	0
CI	punta giglio	RH	0	0
CI	dentul	RH	3	0
CI	dentul	RH	0	0
CI	dentul	RH	2	1
CI	dentul	RH	5	2
CI	dentul	RH	3	1
CI	dentul	RH	0	0
CI	dentul	RH	0	0
CI	dentul	RH	5	2
CI	dentul	RH	3	1
CI	dentul	RH	1	0
CI	dentul	RH	7	2
CI	dentul	RH	6	1
CI	dentul	RH	0	0
CI	dentul	RH	4	2
CI	dentul	RH	5	2
CI	dentul	RH	6	1
CI	dentul	RH	2	0
CI	dentul	RH	4	2
CI	dentul	RH	5	1
CI	dentul	RH	0	0
CI	bramassa	RH	0	0
CI	bramassa	RH	0	0
CI	bramassa	RH	0	0
CI	bramassa	RH	0	0
CI	bramassa	RH	0	0
CI	bramassa	RH	0	0
CI	bramassa	RH	0	0
CI	bramassa	RH	0	0
CI	bramassa	RH	0	0
CI	bramassa	RH	0	0
CI	bramassa	RH	1	0
CI	bramassa	RH	0	0
CI	bramassa	RH	0	0
CI	bramassa	RH	0	0
CI	bramassa	RH	0	0
CI	bramassa	RH	0	0
CI	bramassa	RH	0	0
CI	bramassa	RH	0	0
CI	bramassa	RH	0	0
CI	bramassa	RH	2	0
CI	il faro	RH	1	0
CI	il faro	RH	0	0
CI	il faro	RH	0	0
CI	il faro	RH	0	0
CI	il faro	RH	3	1
CI	il faro	RH	0	0
CI	il faro	RH	0	0
CI	il faro	RH	3	1
CI	il faro	RH	6	0
CI	il faro	RH	1	0
CI	il faro	RH	0	0
CI	il faro	RH	5	0
CI	il faro	RH	1	0
CI	il faro	RH	1	0
CI	il faro	RH	2	0
CI	il faro	RH	2	1
CI	il faro	RH	2	0
CI	il faro	RH	0	0
CI	il faro	RH	0	0
CI	il faro	RH	0	0
CI	tramariglio	RH	0	0
CI	tramariglio	RH	0	0
CI	tramariglio	RH	0	0
CI	tramariglio	RH	1	0
CI	tramariglio	RH	1	1
CI	tramariglio	RH	4	2
CI	tramariglio	RH	0	0
CI	tramariglio	RH	9	8
CI	tramariglio	RH	2	1
CI	tramariglio	RH	0	0
CI	tramariglio	RH	7	6
CI	tramariglio	RH	0	0
CI	tramariglio	RH	3	3
CI	tramariglio	RH	5	4
CI	tramariglio	RH	0	0
CI	tramariglio	RH	5	3
CI	tramariglio	RH	2	2
CI	tramariglio	RH	6	5
CI	tramariglio	RH	5	3
CI	tramariglio	RH	4	4
CI	torre bollo	RH	2	1
CI	torre bollo	RH	1	0
CI	torre bollo	RH	3	1
CI	torre bollo	RH	1	0
CI	torre bollo	RH	3	0
CI	torre bollo	RH	3	0
CI	torre bollo	RH	9	3
CI	torre bollo	RH	2	2
CI	torre bollo	RH	4	1
CI	torre bollo	RH	8	4
CI	torre bollo	RH	7	5
CI	torre bollo	RH	7	4
CI	torre bollo	RH	4	3
CI	torre bollo	RH	7	2
CI	torre bollo	RH	4	3
CI	torre bollo	RH	1	1
CI	torre bollo	RH	6	4
CI	torre bollo	RH	7	2
CI	torre bollo	RH	6	1
CI	torre bollo	RH	1	0
CI	cala barca	RH	1	0
CI	cala barca	RH	0	0
CI	cala barca	RH	0	0
CI	cala barca	RH	0	0
CI	cala barca	RH	1	0
CI	cala barca	RH	2	0
CI	cala barca	RH	0	0
CI	cala barca	RH	0	0
CI	cala barca	RH	0	0
CI	cala barca	RH	0	0
CI	cala barca	RH	5	0
CI	cala barca	RH	4	0
CI	cala barca	RH	4	0
CI	cala barca	RH	0	0
CI	cala barca	RH	2	0
CI	cala barca	RH	0	0
CI	cala barca	RH	1	0
CI	cala barca	RH	0	0
CI	cala barca	RH	1	0
CI	cala barca	RH	0	0
CI	foradada	RH	3	0
CI	foradada	RH	3	0
CI	foradada	RH	5	0
CI	foradada	RH	9	2
CI	foradada	RH	11	2
CI	foradada	RH	2	0
CI	foradada	RH	15	6
CI	foradada	RH	8	2
CI	foradada	RH	7	2
CI	foradada	RH	13	1
CI	foradada	RH	22	3
CI	foradada	RH	9	1
CI	foradada	RH	8	1
CI	foradada	RH	3	1
CI	foradada	RH	11	1
CI	foradada	RH	2	0
CI	foradada	RH	4	0
CI	foradada	RH	6	1
CI	foradada	RH	17	5
CI	foradada	RH	27	5
CI	isola piana	NH	4	1
CI	isola piana	NH	4	3
CI	isola piana	NH	9	6
CI	isola piana	NH	11	6
CI	isola piana	NH	9	6
CI	isola piana	NH	11	4
CI	isola piana	NH	12	3
CI	isola piana	NH	8	1
CI	isola piana	NH	10	9
CI	isola piana	NH	9	6
CI	isola piana	NH	7	3
CI	isola piana	NH	5	3
CI	isola piana	NH	5	2
CI	isola piana	NH	14	4
CI	isola piana	NH	11	3
CI	isola piana	NH	18	3
CI	isola piana	NH	11	1
CI	isola piana	NH	9	1
CI	isola piana	NH	2	1
CI	isola piana	NH	3	2
TV	molarotto A	NH	0	0
TV	molarotto A	NH	3	0.8
TV	molarotto A	NH	1.6	1
TV	molarotto A	NH	0.4	0
TV	molarotto A	NH	0.2	0
TV	molarotto A	NH	0.8	0.6
TV	tavolara A	NH	0	0
TV	tavolara A	NH	0.6	0
TV	tavolara A	NH	0.6	0
TV	tavolara A	NH	1.4	0.6
TV	tavolara A	NH	2.8	1.2
TV	tavolara A	NH	1.2	1.2
TV	capo ceraso sud	RH	0	0
TV	capo ceraso sud	RH	0	0
TV	capo ceraso sud	RH	0	0
TV	capo ceraso sud	RH	0.6	0
TV	capo ceraso sud	RH	0.6	0
TV	capo ceraso sud	RH	2	0
TV	isola barca sconcia	RH	0.4	0
TV	isola barca sconcia	RH	0.2	0.2
TV	isola barca sconcia	RH	0.2	0
TV	isola barca sconcia	RH	0.2	0
TV	isola barca sconcia	RH	0	0
TV	isola barca sconcia	RH	0	0
TV	isola ruia	RH	0.8	0.4
TV	isola ruia	RH	0	0
TV	isola ruia	RH	0.8	0.6
TV	isola ruia	RH	0.6	0.6
TV	isola ruia	RH	0.2	0.2
TV	isola ruia	RH	0.8	0.4
TV	molara est	RH	0.8	0
TV	molara est	RH	1.8	0
TV	molara est	RH	3.6	0
TV	molara est	RH	0	0
TV	molara est	RH	0	0
TV	molara est	RH	0.6	0
TV	molara ovest	RH	0	0
TV	molara ovest	RH	0	0
TV	molara ovest	RH	0	0
TV	molara ovest	RH	0	0
TV	molara ovest	RH	0	0
TV	molara ovest	RH	0.2	0.2
TV	molara sud	RH	0	0
TV	molara sud	RH	0.2	0.2
TV	molara sud	RH	0.4	0.2
TV	molara sud	RH	0.4	0.2
TV	molara sud	RH	1	0.8
TV	molara sud	RH	1.4	1.4
TV	punta coda cavallo sud	RH	0.2	0
TV	punta coda cavallo sud	RH	1.2	0
TV	punta coda cavallo sud	RH	1.4	0
TV	punta coda cavallo sud	RH	0.6	0
TV	punta coda cavallo sud	RH	0.8	0
TV	punta coda cavallo sud	RH	0.4	0.2
TV	tavolara nordest	RH	1.4	0
TV	tavolara nordest	RH	1	0
TV	tavolara nordest	RH	1.6	0
TV	tavolara nordest	RH	0.2	0
TV	tavolara nordest	RH	1	0
TV	tavolara nordest	RH	5.6	0
TV	tavolara nordovest	RH	0.6	0
TV	tavolara nordovest	RH	0.4	0
TV	tavolara nordovest	RH	3	0
TV	tavolara nordovest	RH	2	0.2
TV	tavolara nordovest	RH	2.4	0
TV	tavolara nordovest	RH	3.4	0.2
TV	cala brandinchi/lu impostu	RH	1.2	0
TV	cala brandinchi/lu impostu	RH	1	0.6
TV	cala brandinchi/lu impostu	RH	2.6	0
TV	cala brandinchi/lu impostu	RH	1.8	0
TV	cala brandinchi/lu impostu	RH	2	0.2
TV	cala brandinchi/lu impostu	RH	5	0
TV	isola cana	RH	0	0
TV	isola cana	RH	0	0
TV	isola cana	RH	0	0
TV	isola cana	RH	1.4	0.4
TV	isola cana	RH	0	0
TV	isola cana	RH	0.4	0.4
TV	isola piana	RH	0.2	0.2
TV	isola piana	RH	0	0
TV	isola piana	RH	0	0
TV	isola piana	RH	0	0
TV	isola piana	RH	0	0
TV	isola piana	RH	0	0
TV	isolotto rosso	RH	0.2	0
TV	isolotto rosso	RH	0.8	0
TV	isolotto rosso	RH	0.4	0
TV	isolotto rosso	RH	0.4	0
TV	isolotto rosso	RH	0	0
TV	isolotto rosso	RH	0.2	0
TV	isola verde	RH	0	0
TV	isola verde	RH	0.6	0
TV	isola verde	RH	0	0
TV	isola verde	RH	0.2	0.2
TV	isola verde	RH	0.4	0.4
TV	isola verde	RH	0.4	0.2
TV	porto istana	RH	0.6	0.2
TV	porto istana	RH	0.6	0.2
TV	porto istana	RH	1	0.2
TV	porto istana	RH	0.4	0
TV	porto istana	RH	0.6	0
TV	porto istana	RH	1	0
TV	porto san paolo	RH	2.6	2.4
TV	porto san paolo	RH	4.4	1.4
TV	porto san paolo	RH	3.8	1
TV	porto san paolo	RH	1.4	0.8
TV	porto san paolo	RH	0.6	0
TV	porto san paolo	RH	0.8	0.4
TV	isola proratora	RH	0.6	0.4
TV	isola proratora	RH	1	0.2
TV	isola proratora	RH	0	0
TV	isola proratora	RH	2	0.6
TV	isola proratora	RH	0.4	0
TV	isola proratora	RH	2.2	0.8
TV	punta isuledda	RH	1	0
TV	punta isuledda	RH	0.4	0.4
TV	punta isuledda	RH	0	0
TV	punta isuledda	RH	1.2	0.6
TV	punta isuledda	RH	0.8	0.2
TV	punta isuledda	RH	2.6	1
TV	punta molara	RH	0	0
TV	punta molara	RH	0	0
TV	punta molara	RH	0.4	0
TV	punta molara	RH	0	0
TV	punta molara	RH	0	0
TV	punta molara	RH	0.2	0.2
TV	punta sabatino	RH	0	0
TV	punta sabatino	RH	0	0
TV	punta sabatino	RH	0.2	0.2
TV	punta sabatino	RH	0.6	0
TV	punta sabatino	RH	1	0.6
TV	punta sabatino	RH	1.8	0.8
TV	capo ceraso nord	UH	0.4	0.4
TV	capo ceraso nord	UH	1	0.6
TV	capo ceraso nord	UH	0.8	0.8
TV	capo ceraso nord	UH	1.8	0.4
TV	capo ceraso nord	UH	0.2	0
TV	capo ceraso nord	UH	1.2	0.2
TV	capo figari	UH	0.4	0.4
TV	capo figari	UH	0.8	0.2
TV	capo figari	UH	0.2	0
TV	capo figari	UH	0.6	0.6
TV	capo figari	UH	1	0.8
TV	capo figari	UH	0.6	0.6
CC	BP1	UH	2	0
CC	BP1	UH	0	0
CC	BP1	UH	2	0
CC	BP1	UH	5	1
CC	BP1	UH	0	0
CC	PM3	UH	1	0
CC	PM3	UH	0	0
CC	PM3	UH	0	0
CC	PM3	UH	0	0
CC	PM3	UH	0	0
CC	BP2	NH	13	1
CC	BP2	NH	16	1
CC	BP2	NH	6	0
CC	BP2	NH	18	0
CC	BP2	NH	18	0
CC	BP3	NH	2	0
CC	BP3	NH	10	1
CC	BP3	NH	6	2
CC	BP3	NH	2	1
CC	BP3	NH	4	2
CC	BP4	NH	0	0
CC	BP4	NH	8	0
CC	BP4	NH	1	0
CC	BP4	NH	0	0
CC	BP4	NH	0	0
CC	CC1	NH	0	0
CC	CC1	NH	2	1
CC	CC1	NH	1	0
CC	CC1	NH	1	1
CC	CC1	NH	2	0
CC	CC2	NH	0	0
CC	CC2	NH	5	0
CC	CC2	NH	1	0
CC	CC2	NH	9	0
CC	CC2	NH	17	0
CC	CC3	NH	0	0
CC	CC3	NH	0	0
CC	CC3	NH	0	0
CC	CC3	NH	1	0
CC	CC3	NH	2	0
CC	CC4	NH	6	4
CC	CC4	NH	2	1
CC	CC4	NH	2	0
CC	CC4	NH	6	0
CC	CC4	NH	1	0
CC	CV1	NH	5	1
CC	CV1	NH	4	1
CC	CV1	NH	0	0
CC	CV1	NH	0	0
CC	CV1	NH	8	0
CC	CV2	NH	21	0
CC	CV2	NH	10	2
CC	CV2	NH	23	1
CC	CV2	NH	6	0
CC	CV2	NH	19	2
CC	CV3	NH	9	0
CC	CV3	NH	4	3
CC	CV3	NH	11	2
CC	CV3	NH	12	12
CC	CV3	NH	1	1
CC	CV4	NH	0	0
CC	CV4	NH	2	2
CC	CV4	NH	0	0
CC	CV4	NH	1	0
CC	CV4	NH	1	0
CC	PM1	NH	6	0
CC	PM1	NH	0	0
CC	PM1	NH	3	0
CC	PM1	NH	8	0
CC	PM1	NH	4	0
CC	PM2	NH	0	0
CC	PM2	NH	5	4
CC	PM2	NH	10	3
CC	PM2	NH	1	1
CC	PM2	NH	3	1
CC	PM4	NH	0	0
CC	PM4	NH	0	0
CC	PM4	NH	2	0
CC	PM4	NH	1	0
CC	PM4	NH	1	0
CC	SP1	NH	0	0
CC	SP1	NH	0	0
CC	SP1	NH	0	0
CC	SP1	NH	0	0
CC	SP2	NH	0	0
CC	SP2	NH	0	0
CC	SP2	NH	0	0
CC	SP2	NH	0	0
CC	SP3	NH	0	0
CC	SP3	NH	0	0
CC	SP3	NH	0	0
CC	SP3	NH	1	0
CC	SP3	NH	3	1
CC	SP4	NH	3	2
CC	SP4	NH	1	0
CC	SP3	NH	1	0
CC	SP4	NH	11	0
CC	SP4	NH	10	0
AS	argentiera1	UH	5	1
AS	argentiera1	UH	7	4
AS	argentiera1	UH	3	0
AS	argentiera1	UH	7	2
AS	argentiera1	UH	8	0
AS	argentiera1	UH	6	1
AS	argentiera1	UH	9	1
AS	argentiera1	UH	7	4
AS	argentiera1	UH	7	1
AS	argentiera1	UH	2	0
AS	argentiera1	UH	3	1
AS	argentiera1	UH	8	2
AS	argentiera1	UH	4	1
AS	argentiera1	UH	6	1
AS	argentiera1	UH	5	3
AS	argentiera1	UH	7	0
AS	argentiera1	UH	16	2
AS	argentiera1	UH	18	2
AS	argentiera1	UH	5	1
AS	argentiera1	UH	5	2
AS	argentiera1	UH	14	2
AS	argentiera1	UH	11	2
AS	argentiera1	UH	9	1
AS	argentiera1	UH	7	3
AS	argentiera1	UH	5	0
AS	argentiera1	UH	15	2
AS	argentiera1	UH	6	3
AS	argentiera1	UH	13	0
AS	argentiera1	UH	3	2
AS	argentiera1	UH	14	2
AS	argentiera2	UH	5	2
AS	argentiera2	UH	10	2
AS	argentiera2	UH	6	3
AS	argentiera2	UH	8	3
AS	argentiera2	UH	9	1
AS	argentiera2	UH	25	0
AS	argentiera2	UH	6	0
AS	argentiera2	UH	12	3
AS	argentiera2	UH	4	0
AS	argentiera2	UH	8	4
AS	argentiera2	UH	7	2
AS	argentiera2	UH	7	1
AS	argentiera2	UH	6	1
AS	argentiera2	UH	7	0
AS	argentiera2	UH	7	0
AS	argentiera2	UH	7	3
AS	argentiera2	UH	7	1
AS	argentiera2	UH	5	2
AS	argentiera2	UH	4	0
AS	argentiera2	UH	5	2
AS	argentiera2	UH	5	1
AS	argentiera2	UH	2	0
AS	argentiera2	UH	6	4
AS	argentiera2	UH	5	4
AS	argentiera2	UH	3	0
AS	argentiera2	UH	3	2
AS	argentiera2	UH	3	2
AS	argentiera2	UH	6	1
AS	argentiera2	UH	4	0
AS	argentiera2	UH	10	2
AS	Stintino	UH	7	1
AS	Stintino	UH	5	1
AS	Stintino	UH	4	2
AS	Stintino	UH	3	1
AS	Stintino	UH	2	1
AS	Stintino	UH	5	0
AS	Stintino	UH	4	1
AS	Stintino	UH	5	1
AS	Stintino	UH	6	1
AS	Stintino	UH	4	0
AS	Stintino	UH	5	2
AS	Stintino	UH	3	0
AS	Stintino	UH	11	0
AS	Stintino	UH	5	0
AS	Stintino	UH	5	2
AS	Stintino	UH	6	1
AS	Stintino	UH	6	0
AS	Stintino	UH	12	0
AS	Stintino	UH	13	0
AS	Stintino	UH	15	0
AS	Stintino	UH	6	0
AS	Stintino	UH	5	0
AS	Stintino	UH	6	0
AS	Stintino	UH	7	1
AS	Stintino	UH	8	1
AS	Stintino	UH	5	1
AS	Stintino	UH	7	2
AS	Stintino	UH	8	1
AS	Stintino	UH	9	0
AS	Stintino	UH	12	1
AS	Sito A ex /	UH	4	5
AS	Sito A ex /	UH	1	1
AS	Sito A ex /	UH	3	5
AS	Sito A ex /	UH	2	2
AS	Sito A ex /	UH	0	1
AS	Sito B ex 16	NH	0	0
AS	Sito B ex 16	NH	0	0
AS	Sito B ex 16	NH	0	2
AS	Sito B ex 16	NH	1	1
AS	Sito B ex 16	NH	4	5
AS	Sito C ex 2	NH	7	8
AS	Sito C ex 2	NH	5	5
AS	Sito C ex 2	NH	4	6
AS	Sito C ex 2	NH	5	7
AS	Sito C ex 2	NH	2	3
AS	Sito D ex 3	NH	5	6
AS	Sito D ex 3	NH	7	9
AS	Sito D ex 3	NH	5	5
AS	Sito D ex 3	NH	5	6
AS	Sito D ex 3	NH	3	4
AS	Sito E ex 4	NH	2	3
AS	Sito E ex 4	NH	0	2
AS	Sito E ex 4	NH	0	0
AS	Sito E ex 4	NH	5	5
AS	Sito E ex 4	NH	2	2
AS	Sito F ex 15	NH	2	3
AS	Sito F ex 15	NH	3	6
AS	Sito F ex 15	NH	2	2
AS	Sito F ex 15	NH	1	3
AS	Sito F ex 15	NH	2	6
AS	Sito G ex 12	NH	1	4
AS	Sito G ex 12	NH	1	1
AS	Sito G ex 12	NH	0	3
AS	Sito G ex 12	NH	2	4
AS	Sito G ex 12	NH	1	6
AS	Sito H ex 13	NH	2	4
AS	Sito H ex 13	NH	2	6
AS	Sito H ex 13	NH	0	6
AS	Sito H ex 13	NH	0	5
AS	Sito H ex 13	NH	2	2
AS	Sito I ex 8	NH	3	4
AS	Sito I ex 8	NH	2	2
AS	Sito I ex 8	NH	2	2
AS	Sito I ex 8	NH	1	4
AS	Sito I ex 8	NH	3	5
AS	Sito L ex 6	NH	3	5
AS	Sito L ex 6	NH	3	4
AS	Sito L ex 6	NH	4	4
AS	Sito L ex 6	NH	0	3
AS	Sito L ex 6	NH	2	3
AS	Sito M ex 9	NH	3	7
AS	Sito M ex 9	NH	2	8
AS	Sito M ex 9	NH	2	4
AS	Sito M ex 9	NH	2	3
AS	Sito M ex 9	NH	4	5
AS	Sito N ex 10	NH	2	4
AS	Sito N ex 10	NH	4	4
AS	Sito N ex 10	NH	1	1
AS	Sito N ex 10	NH	1	2
AS	Sito N ex 10	NH	2	2
AS	Sito O ex 7	NH	2	5
AS	Sito O ex 7	NH	2	3
AS	Sito O ex 7	NH	1	3
AS	Sito O ex 7	NH	3	5
AS	Sito O ex 7	NH	2	4
AS	Sito P ex 5	NH	0	0
AS	Sito P ex 5	NH	0	0
AS	Sito P ex 5	NH	1	1
AS	Sito P ex 5	NH	3	3
AS	Sito P ex 5	NH	3	3
AS	Sito Q ex 14	NH	1	1
AS	Sito Q ex 14	NH	0	0
AS	Sito Q ex 14	NH	0	1
AS	Sito Q ex 14	NH	0	0
AS	Sito Q ex 14	NH	3	3
AS	Sito R ex 11	NH	1	1
AS	Sito R ex 11	NH	1	1
AS	Sito R ex 11	NH	1	1
AS	Sito R ex 11	NH	0	0
AS	Sito R ex 11	NH	1	1
AS	Sito S ex 17	NH	5	14
AS	Sito S ex 17	NH	16	18
AS	Sito S ex 17	NH	4	8
AS	Sito S ex 17	NH	10	12
AS	Sito S ex 17	NH	8	8
AS	Sito T ex 22	NH	3	5
AS	Sito T ex 22	NH	6	7
AS	Sito T ex 22	NH	8	9
AS	Sito T ex 22	NH	5	6
AS	Sito T ex 22	NH	9	11
AS	Sito U ex 19	NH	4	5
AS	Sito U ex 19	NH	3	5
AS	Sito U ex 19	NH	9	11
AS	Sito U ex 19	NH	9	10
AS	Sito U ex 19	NH	1	1
AS	Sito V ex 25	NH	3	4
AS	Sito V ex 25	NH	2	2
AS	Sito V ex 25	NH	2	2
AS	Sito V ex 25	NH	2	3
AS	Sito V ex 25	NH	1	2
SN	corona niedda	UH	3	1.4
SN	corona niedda	UH	0.4	0
SN	corona niedda	UH	0.4	0
SN	corona niedda	UH	0.4	0.2
SN	corona niedda	UH	1	0.8
SN	corona niedda	UH	0	0
SN	s. caterina	UH	1.6	0.2
SN	s. caterina	UH	0.4	0.4
SN	s. caterina	UH	0	0
SN	s. caterina	UH	1	0.4
SN	s. caterina	UH	1.6	0.2
SN	s. caterina	UH	1.8	0
SN	su pallosu	UH	1.2	0.6
SN	su pallosu	UH	3	1
SN	su pallosu	UH	5.2	0.4
SN	su pallosu	UH	8.2	0.4
SN	su pallosu	UH	11.2	0
SN	su pallosu	UH	8.8	0.4
SN	putzu idu	UH	1	0.2
SN	putzu idu	UH	4.6	1
SN	putzu idu	UH	2.6	0
SN	putzu idu	UH	3.8	1
SN	putzu idu	UH	1.8	0.6
SN	putzu idu	UH	1.4	0.4
SN	su tingiosu	UH	1.2	0.4
SN	su tingiosu	UH	2.4	0
SN	su tingiosu	UH	4.2	1.6
SN	su tingiosu	UH	2	0.4
SN	su tingiosu	UH	4	1.6
SN	su tingiosu	UH	5.6	1.8
SN	porto palma	UH	0	0
SN	porto palma	UH	0	0
SN	porto palma	UH	0	0
SN	porto palma	UH	3.2	0.4
SN	porto palma	UH	2.6	0.4
SN	porto palma	UH	1	0
SN	funtanazza	UH	0	0
SN	funtanazza	UH	0	0
SN	funtanazza	UH	1.6	0.2
SN	funtanazza	UH	1.8	0.4
SN	funtanazza	UH	2	0.6
SN	funtanazza	UH	1.4	0.2
SN	Catalano	NH	0.4	0.2
SN	Catalano	NH	0.4	0.2
SN	Catalano	NH	0.2	0
SN	Mal di Ventre A	NH	0	0
SN	Mal di Ventre A	NH	0	0
SN	Mal di Ventre A	NH	0	0
SN	Torre Seu 1	NH	1	0.2
SN	Torre Seu 1	NH	0.4	0
SN	Torre Seu 1	NH	1	0.4
SN	Torre Seu 2	NH	2.4	0
SN	Torre Seu 2	NH	1.2	0
SN	Torre Seu 2	NH	1.4	0
SN	Mal di Ventre B	NH	1.8	0
SN	Mal di Ventre B	NH	1.4	0
SN	Mal di Ventre B	NH	1.2	0.2
SN	Capo San Marco	RH	0.6	0.6
SN	Capo San Marco	RH	0.4	0.4
SN	Capo San Marco	RH	0	0
SN	Funtana Meiga R	RH	1	0
SN	Funtana Meiga R	RH	1.6	0
SN	Funtana Meiga R	RH	2	0
SN	Porto S'Uedda R	RH	0.8	0.6
SN	Porto S'Uedda R	RH	1.4	0.4
SN	Porto S'Uedda R	RH	1.8	0.2
SN	Mal di Ventre C	RH	1.6	0
SN	Mal di Ventre C	RH	3.6	0.6
SN	Mal di Ventre C	RH	1.2	0
SN	Su Pallosu	UH	2.2	0.2
SN	Su Pallosu	UH	1.2	0
SN	Su Pallosu	UH	1.6	0.2
SN	Sca e Sali	UH	3.6	0.2
SN	Sca e Sali	UH	2.6	0.2
SN	Sca e Sali	UH	3.2	0.2
