# Supplementary material for: Sea urchin harvest inside marine protected areas: an opportunity to investigate the effects of exploitation where trophic upgrading is achieved
Source: PeerJ. 2022 Mar 7;10:e12971. doi: 10.7717/peerj.12971 (PMC8908888; doi:10.7717/peerj.12971)
Supplement: Supplemental Information 7 — (1) restriction type; (2) site name; (3) old sea urchin abundance; (4) 2019 sea urchin abundance [file peerj-10-12971-s007.xlsx]

## Sheet: change all
restriction	site	old density/m2	2019 density/m2
NH	Catalano	2.4	0.33
NH	Mal di Ventre A	13.4	0.1
NH	Torre Seu 1	14.6667	0.8
NH	Torre Seu 2	13.2	1.66667
NH	Mal di Ventre B	13.6667	1.46667
NH	isola piana	5.2	8.6
NH	ex sito 25	1.7	2.6
NH	ex sito 11	3.1	1.6
NH	ex sito 17	1.8	12
NH	ex sito 2	1.8	5.8
NH	ex sito 3	1	6
NH	ex sito 4	2.7	2.4
NH	ex sito 6	0.3	3.8
NH	ex sito 7	2.2	4
NH	ex sito 8	0.2	3.4
NH	ex sito 9	0.8	5.4
NH	ex sito 10	0.9	2.6
NH	ex sito 12	5.7	3.6
NH	ex sito 13	4.5	4.6
NH	ex sito 16	1.5	1.6
NH	ex sito 19	2.3	6.4
NH	ex sito 22	2.3	7.6
NH	ex sito 14	1.1	1
NH	ex sito 15	5.6	2
NH	molarotto A	10.0667	1
NH	tavolara A	2.23333	1.1
NH	BP2	3.3	3.55
NH	BP3	1	1.2
NH	BP4	0.8	0.45
NH	CC1	0.75	0.3
NH	CC2	1.95	1.6
NH	CC3	1.1	0.15
RH	Funtana Meiga R	13.4	1.53333
RH	Porto S'Uedda R	9.26667	1.33333
RH	Porto S'Uedda P	9.26667	0.133333
RH	Mal di Ventre	6.26667	2.13333
RH	poltagra	8.9	1.05
RH	punta giglio	5.35	0.8
RH	dentul	4.4	3.05
RH	bramassa	3.5	0.15
RH	il faro	3.9	1.35
RH	torre bollo	8.1	4.3
RH	cala barca	7.85	1.05
RH	foradada	13.65	9.25
RH	capo ceraso sud	1	0.533333
RH	isola barca sconcia	0.4	0.166667
RH	isola ruia	1.33333	0.533333
RH	molara est	4.66667	1.13333
RH	molara ovest	0.333333	0.0333333
RH	molara sud	0.666667	0.566667
RH	punta coda cavallo sud	0.666667	0.766667
RH	tavolara nordest	0.666667	1.8
RH	tavolara nordovest	1.2	1.96667
RH	isola cana	2.33333	0.3
RH	isola piana	2.13333	0.0333333
RH	isola proratora	5.06667	1.03333
RH	isola verde	0.466667	0.266667
RH	porto istana	1.73333	0.7
RH	punta sabatino	2.33333	0.6
UH	Su Pallosu	12.9333	1.66667
UH	Sca e Sali	9.93333	3.13333
UH	la speranza	14	4.8
UH	bombarde	5.6	0.8
UH	calabona	3.6	0.8
UH	puntanegra	3.8	0.33
UH	ghiscera	7.8	2.93
UH	torre porticciolo	8.85	1.4
UH	Capo Figari	3.96667	0.6
UH	Capo Ceraso 1	12	4.33
UH	C.Paradiso-Porticcio	4.68	5.33
UH	C.Paradiso-Sorgenti	4.68	5.73
UH	castelsardo	7.6	6.27
UH	BP1	0	0.45
UH	PM3	2	0.05
